## Correction

# Correction: Molecular Phylogenetics and Systematics of the Bivalve Family Ostreidae Based on rRNA Sequence-Structure Models and Multilocus Species Tree

The PLOS ONE Staff

There is an error in the seventh sentence of the Abstract. The subfamily name is misspelled. The correct sentence is: Therefore, the subfamily Crassostreinae (including *Crassostrea*), Saccostreinae **subfam. nov.** (including *Saccostrea* and tentatively *Striostrea*) and Ostreinae (including *Ostreinae* and *Lophinae* taxa) are recognized.

There is a typographical error in the second sentence of the second paragraph in the “Dataset, DNA extraction, amplification and sequencing” section of the Methods. The correct sentence is: It is worth mentioning that, despite some oysters show a split of the 16S rRNA gene into two segments, e.g. in the Asian *Crassostrea*, *C. virginica*, *Saccostrea mordax*, and *Ostrea edulis* [26], [36], our target 16S fragment (3' half portion of the 16S rRNA gene corresponding to domains IV and V) is entirely located in the second segment.

## Reference

1. Salvi D, Macali A, Mariottini P (2014) Molecular Phylogenetics and Systematics of the Bivalve Family Ostreidae Based on rRNA Sequence-Structure Models and Multilocus Species Tree. PLoS ONE 9(9): e108696. doi:10.1371/journal.pone.0108696

**Citation:** The PLOS ONE Staff (2014) Correction: Molecular Phylogenetics and Systematics of the Bivalve Family Ostreidae Based on rRNA Sequence-Structure Models and Multilocus Species Tree. PLoS ONE 9(12): e116014. doi:10.1371/journal.pone.0116014

**Published:** December 15, 2014

**Copyright:** © 2014 The PLOS ONE Staff. This is an open-access article distributed under the terms of the Creative Commons Attribution License, which permits unrestricted use, distribution, and reproduction in any medium, provided the original author and source are credited.
